# Supplementary material
Source: HighWire-hosted journal article supplement (https://jnm.snmjournals.org/highwire/filestream/94405/field_highwire_adjunct_files/0/100958_Supplemental_Data.pdf)
Supplement: 100958_Supplemental_Data.pdf [file 100958_Supplemental_Data.pdf]

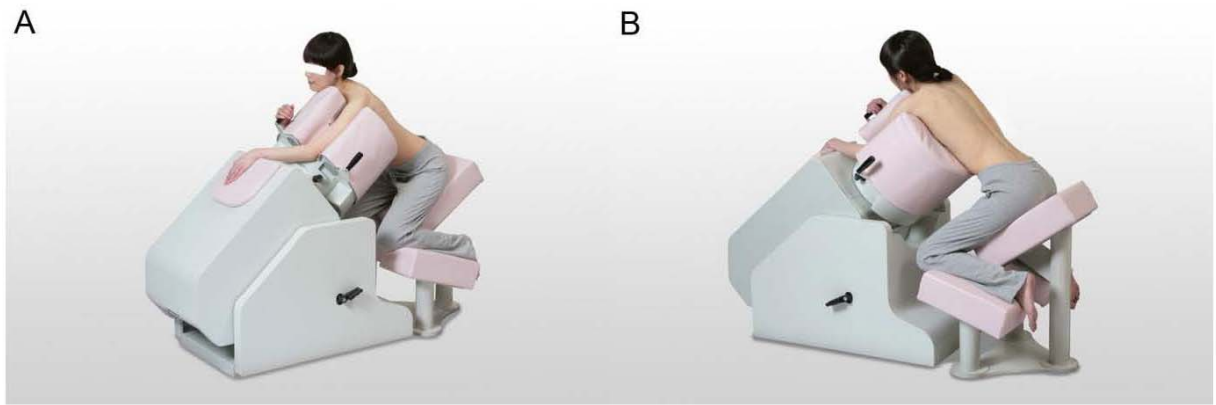

**SUPPLEMENTAL FIGURE 1.** Prototype of dbPET-C with a patient.

The subject will be in the position with her arm left on the open end of the detector (A, B). The detector ring is rotatable for imaging left and right breast, and the gantry is adjustable to patient physiques by changing the distance between the gantry and the saddle. This positioning can be kept without a pain for the subject and the breast movement by breathing can be reduced.
